# Supplementary material for: A comparison of aquaporin expression in mosquito larvae (Aedes aegypti) that develop in hypo-osmotic freshwater and iso-osmotic brackish water
Source: PLoS One. 2020 Aug 20;15(8):e0234892. doi: 10.1371/journal.pone.0234892 (PMC7440623; doi:10.1371/journal.pone.0234892)
Supplement: S2 Data — (XLSX) [file pone.0234892.s005.xlsx]

## Sheet: qPCR Stats Table
AQP	Organ	F Test for Variances	Comparison Test
AaAQP1	GC	F=5.37, Dfn=3, Dfd=4, p=0.14	t-test, t=0.52, df=7, p=0.62
AaAQP1	MT	F=1.27, Dfn=4, Dfd=3, p=0.88	t-test, t=0.11, df=7, p=0.91
AaAQP1	HG	F=67.8, Dfn=4, Dfd=4, p=0.001	t-test, t=0.46, df=8, p=0.65, Mann Whitney, p=0.67
AaAQP2	GC	F=5.43, Dfn=3, Dfd=4 p=0.14	t-test, t=0.76, df=7, p=0.47
AaAQP2	MT	F=1.01, Dfn=3 Dfd=4, p=0.95	t-test, t=0.06, df=7, p=0.95
AaAQP2	HG	F=2.59, Dfn=4, Dfd=4, p=0.37	t-test, t=0.51, df=8, p=0.63
AaAQP3	GC	F=1.03, Dfn=4, Dfd=3, p=1	t-test, t=0.04, df=7, p=0.97
AaAQP3	MT	F=1.75, Dfn=4, Dfd=3, p=0.67	t-test, t=0.12, df=7, p=0.91
AaAQP3	HG	F=6.45, Dfn=4, Dfd=4, p=0.09	t-test, t=0.43, df=8, p=0.67
AaAQP4	GC	F=1.36, Dfn=4, Dfd=3, p=0.84	t-test, t=0.03, df=7, p=0.97
AaAQP4	MT	F=2.31, Dfn=4, Dfd=3, p=0.52	t-test, t=0.22, df=7, p=0.83
AaAQP4	HG	F=2.38, Dfn=4, Dfd=4, p=0.42	t-test, t=0.34, df=8, p=0.74
AaAQP5	GC	F=1.11, Dfn=4, Dfd=3, p=0.97	t-test, t=0.05, df=7, p=0.96
AaAQP5	MT	F=1.13, Dfn=3, Dfd=4, p=0.87	t-test, t=0.02, df=7, p=0.98
AaAQP5	HG	F=1.89, Dfn=4, Dfd=4, p=0.55	t-test, t=0.16, df=8, p=0.87
AaAQP6	GC	F=1.32, Dfn=4, Dfd=3, p=0.85	t-test, t=0.17, df=7, p=0.87
AaAQP6	MT	F=11.19, Dfn=4, Dfd=3, p=0.07	t-test, t=0.52, df=7, p=0.61
AaAQP6	HG	F=1.19, Dfn=4, Dfd=4, p=0.87	t-test, t=0.18, df=8, p=0.86

## Sheet: Western Blot Stats Table
AQP	Organ	F Test for Variances	Comparison Test
AaAQP1	GC	F=66.5, Dfn=4, Dfd=4, p=0.001	t-test, t=2.32, df=8, p=0.04, Mann Whitney p=0.15
AaAQP1	HG	F=3.78, Dfn=4, Dfd=4, p=0.22	t-test, t=1.55, df=8, p=0.15
AaAQP1	MT	F=1.5, Dfn=4, Dfd=4, p=0.69	t-test, t=0.59, df=8, p=0.57
AaAQP4	GC	F=1.14, Dfn=4, Dfd=4, p=0.89	t-test, t=1.42, df=8, p=0.19
AaAQP4	MT	F=1.38, Dfn=4, Dfd=4, p=0.76	t-test, t=0.03, df=8, p=0.97
AaAQP4	HG	F=1.47 Dfn=4, Dfd=4, p=0.71	t-test, t=0.92, df=8, p=0.38
AaAQP5	GC	F=2.69, Dfn=4, Dfd=4, p=0.35	t-test, t=1, df=8, p=0.34
AaAQP5	MT	F=1.75, Dfn=4, Dfd=4, p=0.6	t-test, t=0.49, df=8, p=0.63
AaAQP5	HG	F=1.08, Dfn=4, Dfd=4, p=0.94	t-test, t=0.19, df=8, p=0.85
