# Supplementary material for: A comparison of aquaporin expression in mosquito larvae (Aedes aegypti) that develop in hypo-osmotic freshwater and iso-osmotic brackish water
Source: PLoS One. 2020 Aug 20;15(8):e0234892. doi: 10.1371/journal.pone.0234892 (PMC7440623; doi:10.1371/journal.pone.0234892)
Supplement: S3 Data — (XLSX) [file pone.0234892.s006.xlsx]

## Sheet: GC
Tissue	Gastric Caeca
Protein	AQP1
	Round 1		Round 2		Round 3		Round 4		Round 5
	FW	BW	FW	BW	FW	BW	FW	BW	FW	BW
50kDa	12991.8	41885.7	9485	48908.4	17871.4	23669.4	11146.2	25099	9236.88	9834.93
Loading control	225270	210161	148033	219683	226042	213714	192424	217645	147847	206864
Normalized	0.0576719	0.199303	0.0640736	0.222632	0.0790622	0.110752	0.0579254	0.115321	0.0624759	0.0475429
Relative Value	0.897732	3.10239	0.997382	3.46554	1.2307	1.72399	0.901678	1.7951	0.972511	0.740062
Totals	1	2.16542
Tissue	Gastric Caeca
Protein	AQP4
	Round 1		Round 2		Round 3		Round 4		Round 5
	FW	BW	FW	BW	FW	BW	FW	BW	FW	BW
30-35kDa	28917.7	29112.5	38615.9	18135.1	11388.8	3690.25	14021.2	6732.37	32015.7	2150
57-58kDa	23220.9	24324.1	40076.9	31582.1	11800	7839	24280.5	19868.2	18035.4	4680.71
Loading control	204467	180271	194777	218949	203323	245035	200607	215155	193505	207072
Normalized	0.254997	0.296424	0.404014	0.227072	0.114049	0.0470514	0.190929	0.123634	0.258655	0.0329871
Relative Value	1.04281	1.21223	1.65222	0.928612	0.466403	0.192416	0.780803	0.505602	1.05777	0.134901
Totals	1	0.594752
Tissue	Gastric Caeca
Protein	AQP5
	Round 1		Round 2		Round 3		Round 4		Round 5
	FW	BW	FW	BW	FW	BW	FW	BW	FW	BW
30kDa	51567.1	42099.2	37776.3	4078.54	38074.5	20953.8	46374.1	35727.6	47610.1	43931.8
55kDa	49434.3	32176.7	1688.59	8939.25	32464.5	26798	24807.1	26586	4145.49	24722.3
Loading control	207791	246963	147474	190866	153361	192759	195166	142018	164361	158129
Normalized	0.486071	0.300757	0.267605	0.0682039	0.459953	0.247728	0.364722	0.438771	0.31489	0.434165
Relative Value	1.2837	0.794292	0.706738	0.180125	1.21472	0.654243	0.96322	1.15878	0.831616	1.14662
Totals	1	0.786812

## Sheet: HG
Tissue	Hindgut
Protein	AQP1
	Round 1		Round 2		Round 3		Round 4		Round 5
	FW	BW	FW	BW	FW	BW	FW	BW	FW	BW
23 kDa	20197.8	14824.7	25350.6	26212.4	18144	15635.8	49535.1	9669.47	13585.7	7716.78
Loading control	107071	101467	100863	96580.5	101811	105847	91349.7	125084	81293.5	112914
Normalized	0.18864	0.146104	0.251338	0.271404	0.178212	0.147721	0.542259	0.0773038	0.167119	0.0683423
Relative Value	0.710474	0.550269	0.94661	1.02219	0.671199	0.556358	2.0423	0.291148	0.629416	0.257397
Totals	1	0.535472
Tissue	Hindgut
Protein	AQP4
	Round 1		Round 2		Round 3		Round 4		Round 5
	FW	BW	FW	BW	FW	BW	FW	BW	FW	BW
57-58kDa	52024.1	30122.7	19556.5	30692.4	40083.7	35898.7	18564.1	5631.12	9394.37	969.7
Loading control	129173	152927	161942	146412	145300	150825	120796	169841	114049	131484
Normalized	0.402747	0.196973	0.120762	0.20963	0.275868	0.238015	0.153681	0.0331552	0.0823715	0.00737501
Relative Value	1.94483	0.951168	0.58315	1.01229	1.33214	1.14935	0.742113	0.160103	0.397765	0.0356133
Totals	1	0.661705
Tissue	Hindgut
Protein	AQP5
	Round 1		Round 2		Round 3		Round 4		Round 5
	FW	BW	FW	BW	FW	BW	FW	BW	FW	BW
25kDa	19444.8	24027.2	10992.4	44225.2	36693.2	39139.2	25355	21251.2	12713	13035.5
30kDa	4800.71	25356.4	44221.8	53978.3	35759.6	39118	38220	38926.2	41923	10558.9
Loading control	145322	162408	139992	144491	92608.1	107711	132301	156745	96649.8	243141
Normalized	0.133805	0.147944	0.0785215	0.306076	0.39622	0.363373	0.191647	0.135578	0.131536	0.0536128
Relative Value	0.718047	0.79392	0.421375	1.64251	2.12626	1.94999	1.02845	0.727561	0.705871	0.287706
Totals	1	1.08034

## Sheet: MT
Tissue	Malpighian Tubules
Protein	AQP1
	Round 1		Round 2		Round 3		Round 4		Round 5
	FW	BW	FW	BW	FW	BW	FW	BW	FW	BW
23kDa	18152.2	23433.4	29213.1	44262.2	38928.2	27766.6	44723.4	36051.4	45977.2	23227.9
Loading control	142903	190845	180076	194597	190602	204553	196422	185563	163471	105105
Normalized	0.127025	0.122788	0.162226	0.227456	0.204239	0.135743	0.227691	0.194282	0.281256	0.220996
Relative Value	0.633579	0.612446	0.80916	1.13452	1.01871	0.677064	1.13569	0.969047	1.40286	1.10229
Totals	1	0.899074
Tissue	Malpighian Tubules
Protein	AQP4
	Round 1		Round 2		Round 3		Round 4		Round 5
	FW	BW	FW	BW	FW	BW	FW	BW	FW	BW
24-26kDa	12604.7	20526.4	11360.2	5752.83	34645.9	7164.76	29820.1	14300	13558.2	3817.83
57-58kDa	23132.2	40559.1	19673.3	41064.4	28388.2	39422	24802.8	30061.2	29544.3	17228.7
Loading control	103021	112269	114083	101753	118420	117426	126276	117191	103371	90291.6
Normalized	0.346889	0.5441	0.272025	0.460107	0.532291	0.396732	0.432566	0.378539	0.41697	0.233095
Relative Value	0.8669	1.35975	0.679812	1.14984	1.33024	0.991462	1.08101	0.945996	1.04204	0.582521
Totals	1	1.00591
Tissue	Malpighian Tubules
Protein	AQP5
	Round 1		Round 2		Round 3		Round 4		Round 5
	FW	BW	FW	BW	FW	BW	FW	BW	FW	BW
23-32kDa	15432.4	35418.9	28743	29646.2	33322.1	30032.8	41544	26538.6	22101.4	3528.35
Loading control	169617	179616	163318	143168	164893	166755	171141	173393	145517	153373
Normalized	0.0909836	0.197192	0.175994	0.207072	0.202083	0.180101	0.242747	0.153055	0.151882	0.023005
Relative Value	0.526715	1.14157	1.01885	1.19877	1.16988	1.04263	1.40529	0.886051	0.879263	0.133179
Totals	1	0.880438
